# Supplementary material
Source: publisher figshare collection journal article supplement (https://tandf.figshare.com/ndownloader/files/23072978)
Supplement: Supplementary file 1 [file 23072978]

**Web Appendix.** Technology acceptance questionnaire

|  |
| --- |
| Perceived ease of use1 |
| 1. I have sufficient knowledge and skills to use the platform |
| 1. The platform is easy to use |
| 1. The workload required to use the platform is balanced by the perceived benefits |
| Perceived usefulness1 |
| 1. The use of the platform makes a patient’s rehabilitation process more transparent |
| 1. The use of the platform facilitates a more personalised treatment |
| 1. The use of the platform increases the quality of treatment |
| User satisfaction2 |
| 1. Please rate your overall satisfaction with regard to the ACL monitor |

*Note:*

1 all items scored on a 7-point NRS ranging from 1 (completely disagree) to 7 (completely agree);

2 item scored on an 11-point NRS from 0 (completely dissatisfied) to 10 (completely satisfied).
